# Supplementary material for: Bio-mineralisation, characterization, and stability of calcium carbonate containing organic matter
Source: Royal Society of Chemistry journal article supplement (doi:10.1039/d1ra00615k), 2021-01-01
Supplement: d1ra00615k1.pdf [file d1ra00615k1.pdf]

Supplementary material for “Bio-mineralisation, characterization, and stability of calcium carbonate containing organic matter”

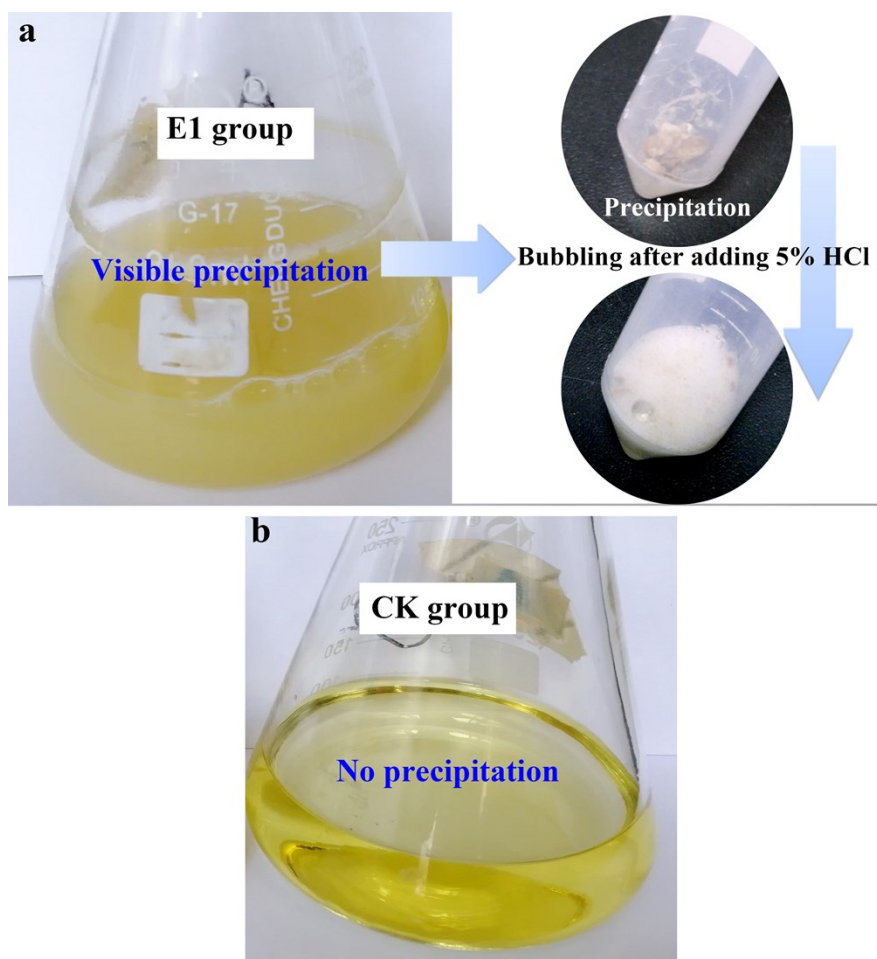

**Fig. S1. Bio-induced synthesis processes of calcium carbonate and its preliminary identification.** E1 group: added 2 mL bacterial seed liquid. CK group: added 2 mL inactivated bacterial seed liquid.

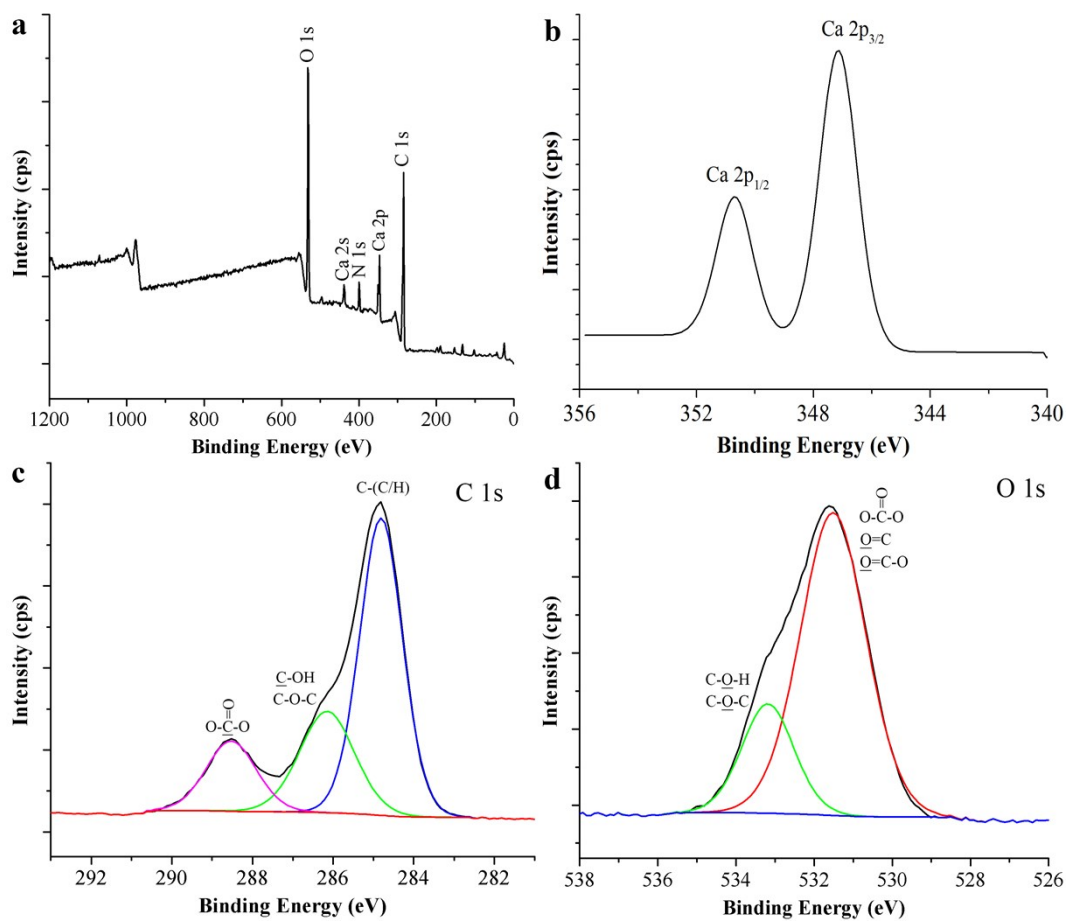

**Fig. S2. XPS wide survey scans (a) of vaterite and its high-resolution Ca 2p (b), C 1s (c), and O 1s (d) spectra.**

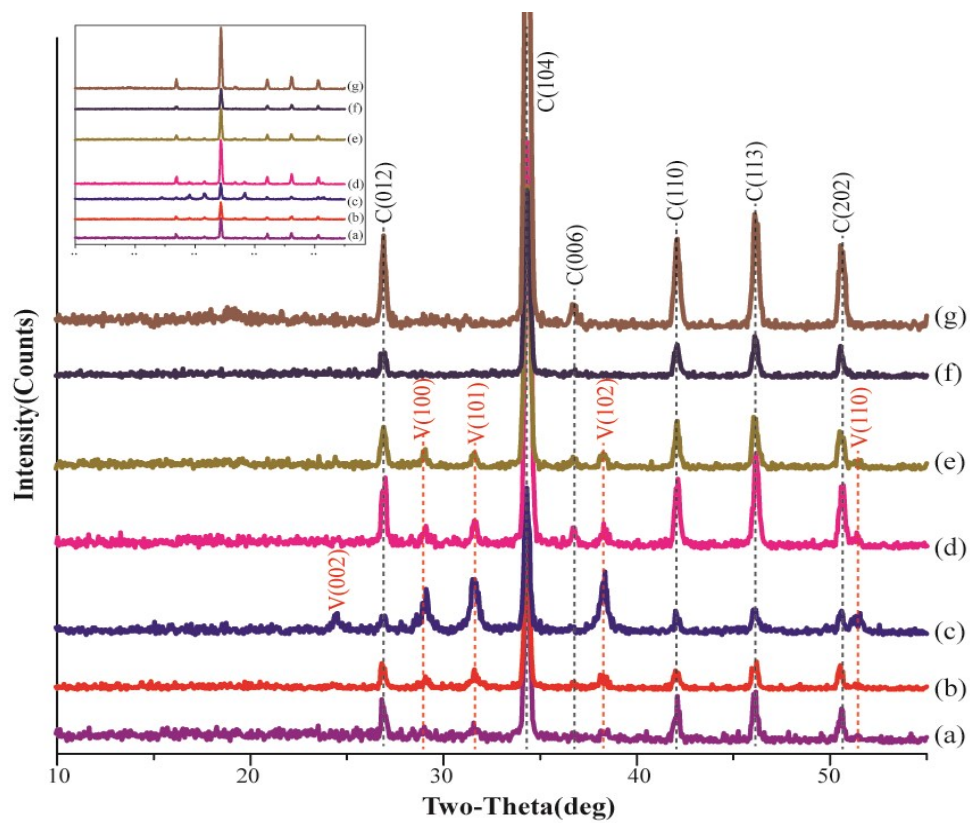

**Fig. S3. XRD patterns of the products obtained by bio-mimetic mineralisation.**

XRD patterns of the products mineralised for 14 days in the presence of crude extracellular protein (a), crude EPS (b), fermentation supernatant (c), glucose (d), sucrose (e), bovine serum albumin (f), and distilled water (g).
